# Supplementary material for: Evaluation of cultivated and wild genotypes of Lens species under alkalinity stress and their molecular collocation using microsatellite markers
Source: PLoS One. 2018 Aug 13;13(8):e0199933. doi: 10.1371/journal.pone.0199933 (PMC6089424; doi:10.1371/journal.pone.0199933)
Supplement: S1 Table — (XLSX) [file pone.0199933.s005.xlsx]

## Sheet: Sheet1
Phenotypic responses of lentil genotypes under 20mM and 40mM NaHCO3 concentrations
reduction (per cent)
Sl No.	Genotypes	Tretment	GM	RL	SL	FWR	FWS	DWR	DWS	survival	Score
1	ILL-560	20	-10.1333	-19.7207	-23.3946	-18.7989	-29.8747	-18.6638	-31.6667	90	1
		40	-20.2	-29.5264	-34.2583	-28.6659	-38.7647	-29.8685	-48.8889	50.1	2.6
2	L-7903	20	-10.5333	-17.3188	-26.5897	-16.9134	-29.1998	-25.1235	-37.8157	91	1
		40	-19.8333	-30.1282	-39.4128	-30.5578	-40.3311	-35.5743	-50.5682	50.1	2.6
3	PSL_7	20	-8.96667	-19.3404	-25.8194	-17.2369	-26.6486	-28.1373	-36.7647	93	1
		40	-19.4333	-30.2965	-38.8574	-25.4481	-38.1013	-39.175	-49.5752	51.1	2.46667
4	PSL-1	20	-7.83333	-18.7131	-21.5849	-17.3083	-24.3429	-26.8034	-31.391	91	1
		40	-17.9	-26.5037	-35.069	-24.653	-35.1108	-39.8036	-52.9292	51.1	2.4
5	PAL_3	20	-7.83333	-17.3117	-22.3097	-18.21	-25.4424	-24.404	-31.5033	92	1
		40	-17.2	-28.6754	-33.8259	-26.5424	-30.1103	-37.0055	-46.2745	52.2	2.46667
6	ILL-5722	20	-9.06667	-17.8488	-21.4686	-18.1667	-27.4515	-19.5178	-38.282	86.6667	1.16667
		40	-19.6333	-29.2154	-23.7369	-21.9953	-39.6741	-28.9893	-50.2957	50	2.33333
7	ILL-5883	20	-38.3667	-38.096	-46.8876	-31.0126	-47.0303	-38.1304	-53.4775	52.3333	2.26667
		40	-50.5333	-48.4011	-59.6451	-49.5425	-57.5191	-46.884	-68.9776	0	5
8	BM-4	20	-36.1667	-37.2375	-41.7839	-27.7116	-45.9813	-33.0386	-41.9518	52.3333	2.26667
		40	-51.0667	-47.4359	-56.6625	-49.3489	-55.4563	-42.0531	-58.3772	0	5
9	LC-300-1	20	-36.1667	-37.2375	-41.7839	-27.7116	-45.9813	-33.0386	-41.9518	52.3333	2.26667
		40	-51.0667	-47.4359	-56.6625	-49.3489	-55.4563	-42.0531	-58.3772	0	5
10	ILL-590	20	-14.9967	-16.3467	-23.7233	-20.8367	-22.2267	-24.0533	-22.6133	52.3333	2.33333
		40	-30.3333	-25.5533	-37.75	-28.9295	-33.8633	-35.4379	-39.7234	0	4.86667
11	ILL-6002	20	-9.5	-26.6517	-21.5373	-19.8343	-28.9473	-27.1809	-37.8326	87.6667	1.23333
		40	-19.8	-28.585	-31.6493	-28.7611	-37.1124	-39.8314	-46.6387	52.2	2.46667
12	ILL-7349	20	-38.0333	-38.5199	-41.4202	-31.3866	-45.8775	-39.9371	-54.8026	51.1	2.4
		40	-49.7	-42.6332	-53.7318	-42.8489	-58.8333	-47.3662	-66.1172	0	4.93333
13	ILL-76037	20	-39.1667	-36.2054	-49.4006	-35.483	-41.7805	-33.5579	-51.6448	56.7667	2.53333
		40	-44.5667	-44.4329	-58.4743	-42.7188	-54.0068	-47.285	-67.2533	0	5
14	ILL-7978	20	-38.0333	-32.432	-48.0646	-37.9365	-41.7004	-31.7544	-53.4477	57.8667	2.26667
		40	-49.9	-49.127	-55.47	-44.6657	-53.9099	-49.152	-69.4487	0	4.93333
15	ILL-7979	20	-37.7	-40.6884	-49.4208	-39.1618	-42.7594	-34.0885	-56.7617	55.6667	2.33333
		40	-49	-48.8123	-55.9498	-49.6636	-52.338	-49.4438	-62.8411	0	5
16	ILL-7982	20	-38.9333	-34.7004	-49.0853	-33.4999	-45.8877	-32.7187	-57.4332	52.2	2.13333
		40	-49.9	-49.2914	-58.6846	-42.3691	-55.4109	-49.0754	-64.4309	0	5
17	ILL-8006	20	-37.7	-34.3956	-49.5685	-33.9487	-41.1121	-38.2556	-51.422	57.8667	2.33333
		40	-50.3667	-48.5714	-59.2711	-43.5436	-55.4808	-47.6927	-68.9153	0	5
18	ILL-8108	20	-39.5	-38.3455	-42.4472	-39.9621	-42.7542	-32.6796	-52.2266	56.7667	2.4
		40	-49.5667	-49.1751	-53.198	-45.3588	-53.8082	-47.7745	-68.9285	0	5
19	ILL-8329	20	-37.3667	-35.2095	-45.1814	-33.1721	-45.6735	-34.6179	-53.4384	55.6667	2.33333
		40	-49.9	-45.13	-54.134	-42.0601	-56.2842	-47.6434	-63.61	0	4.93333
20	ILL-91887	20	-37.7	-35.1311	-41.6783	-35.898	-42.548	-35.0336	-52.6048	55.6667	2.46667
		40	-49.3667	-49.8007	-53.2727	-44.845	-54.4045	-47.6178	-64.1636	0	5
21	ILL-9841	20	-38.4667	-32.0493	-40.88	-39.4082	-41.1698	-34.4717	-51.5152	60.3333	2.4
		40	-49.9	-46.4931	-44.7472	-42.9982	-51.7063	-48.7562	-61.4899	0	5
22	L-4602	20	-38.0333	-33.5811	-40.3918	-39.3723	-45.383	-32.6429	-55.1895	62.4333	2.4
		40	-52.8	-47.3858	-54.1362	-43.7224	-52.8317	-48.3898	-65.1101	0	5
23	ILL-9900	20	-40.5667	-37.0655	-42.4643	-37.7116	-40.6756	-32.7495	-53.9075	60.2333	2.4
		40	-52.8333	-48.9843	-53.3286	-42.1386	-55.8007	-46.945	-65.4306	0	5
24	ILL-9916	20	-39.2667	-38.2092	-42.8667	-38.2274	-40.8337	-33.6205	-53.7814	53.4333	2.46667
		40	-48.5667	-49.534	-54.8184	-42.4884	-48.5659	-49.9832	-68.2492	0	5
25	ILL-9941	20	-37.7	-33.9809	-41.9413	-33.0924	-41.1216	-28.4973	-55.7914	58	2.4
		40	-49.5667	-42.841	-50.5658	-42.5822	-47.9807	-48.2464	-62.3192	0	5
26	ILL-9960	20	-38.0333	-37.7184	-42.4822	-39.6847	-42.9862	-36.9011	-53.7776	56.7667	2.33333
		40	-48.2333	-49.1467	-57.0067	-43.353	-53.6993	-48.2923	-63.2936	0	5
27	FLIP-96-51	20	-37.7333	-36.1429	-45.9924	-39.185	-42.5277	-38.5665	-52.42	62.4333	2.33333
		40	-48.5667	-48.9679	-59.4332	-43.2561	-51.6799	-47.869	-63.5522	0	5
28	ILL-10795	20	-37.3667	-31.828	-42.2089	-35.866	-43.2892	-31.3511	-58.2451	62.4333	2.26667
		40	-49.9667	-47.9099	-56.8911	-42.177	-52.2234	-45.9	-61.735	0	5
29	ILL-10804	20	-37.7	-36.1598	-45.5977	-33.5438	-49.7956	-35.1283	-51.4777	62.4333	2.33333
		40	-48.5667	-48.9976	-57.8201	-42.5338	-59.7306	-45.7716	-66.7459	0	5
30	ILL-10805	20	-37.3667	-36.3967	-47.5941	-35.091	-40.7257	-34.03	-54.8454	62.4333	2.33333
		40	-47.9	-48.8892	-57.6839	-42.8096	-51.1191	-46.7735	-67.7788	0	4.93333
31	ILL-10806	20	-37.3667	-32.0205	-44.0226	-33.9198	-43.3753	-36.8755	-53.708	60.2333	2.4
		40	-48.5667	-49.7135	-59.6398	-43.0629	-50.9986	-47.6949	-64.7442	0	5
32	ILL-10807	20	-36.3667	-32.1538	-45.2469	-36.5616	-49.4477	-36.2762	-50.4971	62.4333	2.33333
		40	-46	-45.6571	-57.4241	-46.5514	-59.4353	-49.0032	-67.2515	0	5
33	ILL-10809	20	-37.3667	-35.7124	-44.0944	-36.604	-47.8697	-34.4761	-50.3747	59	2.4
		40	-47.7667	-46.4324	-56.7284	-41.7202	-57.8407	-45.9489	-62.5617	0	5
34	ILL-10810	20	-37.3667	-40.0281	-47.0624	-34.4244	-46.3789	-38.7003	-56.9223	57.8667	2.33333
		40	-47.9	-49.0436	-59.2613	-42.2264	-57.1847	-45.2592	-67.026	0	4.93333
35	ILL-10811	20	-37.3667	-36.5676	-49.5323	-34.6934	-48.8153	-36.3394	-55.9303	60.3333	2.4
		40	-48.7333	-42.2824	-57.8201	-42.6834	-59.2665	-46.63	-69.3738	0	5
36	ILL-10812	20	-39.8333	-36.8764	-45.8051	-33.1234	-47.5677	-37.772	-55.0648	62.4333	2.33333
		40	-49.5667	-44.2125	-58.3628	-42.0427	-56.6493	-47.7998	-67.0679	0	5
37	ILL-10817	20	-37.3667	-34.5759	-46.333	-35.6666	-44.9382	-31.3798	-50.9349	60.2333	2.46667
		40	-48.2333	-48.1381	-59.0754	-49.765	-54.5384	-42.747	-65.7665	0	5
38	ILL-10818	20	-38.3667	-35.9028	-48.9305	-35.891	-42.6328	-39.2281	-55.873	61.3333	2.33333
		40	-47.8667	-48.4343	-58.8235	-43.4893	-53.9129	-48.6761	-69.4444	0	5
39	ILL-10819	20	-38.0333	-35.7127	-43.999	-34.5566	-52.0433	-34.1165	-55.3216	60.2333	2.46667
		40	-49.5667	-40.946	-56.6921	-42.6609	-59.4021	-47.8919	-68.5046	0	4.93333
40	ILL-10820	20	-38.0333	-34.1158	-45.8051	-36.3354	-41.2062	-35.4347	-53.0637	60.2333	2.33333
		40	-48.8667	-46.3545	-58.6049	-41.2243	-51.0121	-47.2475	-66.476	0	5
41	ILL-10823	20	-37.7	-35.7197	-47.8197	-38.8704	-45.6726	-31.3591	-55.3216	53.4333	2.4
		40	-48.8667	-47.3046	-56.2554	-49.4094	-55.0607	-46.3057	-66.4495	0	5
42	ILL-10826	20	-37.7	-35.3213	-48.3549	-39.5198	-42.6646	-32.3399	-55.7143	55.6667	2.4
		40	-47.9	-47.5561	-58.2553	-49.0748	-53.8659	-46.9227	-66.3757	0	5
43	ILL-10827	20	-37.3667	-39.7749	-46.3102	-37.2707	-47.6792	-35.3936	-56.6986	58	2.4
		40	-48.2333	-48.713	-57.1817	-49.7707	-56.8302	-47.3254	-69.7269	0	5
44	ILL-10831	20	-37.3667	-38.901	-46.2716	-36.9636	-40.6953	-35.3001	-57.2264	58	2.4
		40	-48.5667	-47.3235	-58.8573	-49.4673	-54.099	-49.4628	-69.6951	0	5
45	ILL-10834	20	-37.3667	-38.3445	-42.6076	-35.4149	-43.3924	-36.9279	-51.5327	61.3333	2.33333
		40	-49	-42.1668	-57.3949	-45.3053	-52.1754	-43.6584	-67.3752	0	5
46	ILL-10835	20	-37.3667	-39.1606	-47.29	-39.7557	-42.4976	-36.8858	-56.2573	59	2.4
		40	-48.1333	-49.6992	-59.223	-47.1381	-53.331	-47.0687	-67.4464	0	5
47	ILL-10836	20	-37.3667	-40.1095	-42.6655	-38.5843	-42.3885	-34.6034	-54.8454	61.3333	2.4
		40	-48.7667	-46.7273	-54.9076	-48.4404	-52.1586	-50.5288	-65.5945	0	5
48	ILL-10837	20	-38.3667	-33.1026	-41.0565	-36.8577	-43.9497	-37.6129	-51.5286	59	2.4
		40	-48.5667	-49.0538	-55.6519	-49.0464	-52.9958	-46.9959	-65.6218	0	5
49	ILL-10848	20	-37.3667	-33.5174	-47.9985	-39.245	-44.9746	-37.2915	-53.1944	58	2.4
		40	-48.5667	-47.0266	-56.9424	-46.8453	-53.591	-47.88	-69.0741	0	5
50	ILL-10893	20	-37.3667	-32.166	-48.9222	-38.8704	-40.1752	-37.2436	-51.6708	59	2.4
		40	-48.8667	-46.5375	-59.0786	-49.4094	-52.0728	-48.6803	-66.3534	0	5
51	ILL-10894	20	-37.3667	-39.1105	-43.9704	-37.351	-43.7225	-33.9997	-55.6558	61.3333	2.33333
		40	-46.9333	-49.6136	-55.6232	-48.9772	-53.0633	-44.5731	-66.2824	0	5
52	ILL-10897	20	-38.3667	-33.8268	-46.5289	-39.4016	-44.8001	-38.1429	-53.2581	62.4333	2.33333
		40	-48.8667	-49.6456	-54.7187	-48.932	-53.9621	-48.4321	-63.9098	0	4.93333
53	ILL-10913	20	-37.3667	-34.7848	-48.5099	-38.9801	-44.3673	-32.0123	-53.7368	62.4333	2.33333
		40	-48.8667	-49.3186	-57.3897	-49.7323	-52.9553	-46.4397	-64.7487	0	5
54	ILL-10915	20	-37.3667	-35.69	-48.6372	-36.5169	-43.8156	-35.8727	-50.0835	62.4333	2.4
		40	-48.4667	-49.3457	-58.5915	-48.7893	-53.1377	-47.9767	-66.1863	0	5
55	ILL-10917	20	-37.3667	-35.0608	-43.9163	-37.7556	-43.3989	-34.7534	-54.8454	60.2333	2.33333
		40	-47.9	-48.3116	-56.5771	-49.1981	-54.0374	-48.4118	-68.0284	0	4.93333
56	ILL-10921	20	-37.3667	-37.5694	-47.5479	-37.5413	-45.7606	-37.3724	-52.6316	60.3333	2.33333
		40	-47.9	-49.9936	-57.4106	-49.0159	-55.1187	-47.1588	-68.5229	0	4.93333
57	ILL-10922	20	-37.3667	-38.1862	-47.0528	-37.0083	-49.2512	-39.0724	-53.7343	55.4333	2.53333
		40	-48.2333	-49.7268	-56.8011	-49.0364	-58.1868	-46.0924	-66.7836	0	5
58	ILL-10951	20	-37.3667	-37.3901	-47.6359	-37.5413	-42.1935	-32.7356	-57.7866	55.6667	2.33333
		40	-47.9	-48.6035	-54.0252	-47.5345	-51.2163	-45.1575	-66.6372	0	5
59	ILL-10953	20	-37.3667	-37.05	-42.6076	-38.8704	-47.856	-37.0909	-54.2735	53.3333	2.46667
		40	-47.9	-49.7272	-57.7675	-49.4094	-55.2516	-49.7393	-63.4758	0	5
60	ILL-10960	20	-37.3667	-38.1209	-46.622	-39.6286	-43.1019	-33.3162	-52.1495	67	2.26667
		40	-50.2667	-45.9854	-56.6135	-48.4255	-52.055	-46.5685	-64.7156	0	5
61	ILL-10961	20	-38.1667	-33.4022	-44.4596	-37.192	-41.8898	-33.1227	-52.033	60.2333	2.46667
		40	-46.9333	-48.1927	-57.5375	-47.839	-52.9958	-45.8446	-65.9236	0	5
62	ILL-10963	20	-37.3667	-38.5306	-45.2656	-38.8974	-51.3829	-33.195	-54.2385	54.5667	2.53333
		40	-48.5667	-49.8261	-58.1128	-49.794	-59.0922	-48.0874	-64.0498	0	5
63	ILL-10964	20	-38.0333	-36.002	-49.6681	-36.8812	-42.0251	-37.1994	-51.4006	54.5667	2.46667
		40	-48.5667	-49.0532	-58.9296	-48.6988	-52.5748	-49.5044	-66.7834	0	5
64	ILL-10965	20	-37.3667	-36.4885	-46.2812	-38.3831	-49.6734	-38.5836	-54.1667	53.3333	2.46667
		40	-47.5667	-49.06	-58.1725	-48.4868	-53.9655	-48.935	-66.7989	0	5
65	ILL-10967	20	-37.3667	-34.1576	-44.8808	-39.6038	-44.9746	-35.0571	-55.2778	62.4333	2.33333
		40	-48.8667	-49.0727	-56.8725	-48.9518	-53.4037	-47.881	-65.3704	0	5
66	ILL-10969	20	-38.0333	-35.1372	-42.4288	-36.8577	-42.8881	-35.4678	-58.3995	60.2333	2.4
		40	-48.7667	-48.6223	-57.3333	-48.4846	-51.3603	-49.1734	-67.3611	0	4.8
67	ILL-10970	20	-38.1667	-34.7299	-41.0146	-38.5032	-43.2892	-31.9041	-55.7593	54.5667	2.53333
		40	-49.3667	-48.9847	-54.983	-47.3565	-53.9655	-48.6733	-69.3691	0	5
68	ILL-10972	20	-39.0667	-37.6307	-46.9306	-36.1903	-43.7625	-35.6604	-52.6629	55.6667	2.46667
		40	-46.2	-46.7668	-58.5203	-46.9296	-52.9958	-46.8436	-65.1003	0	5
69	ILL-1970	20	-37.3667	-34.4485	-46.9719	-37.6851	-42.1935	-32.6328	-58.3542	62.4333	2.26667
		40	-47.9	-48.8919	-58.5203	-48.7311	-53.2762	-48.6901	-68.7413	0	5
70	ILL-358	20	-37.7	-34.1062	-47.02	-39.1202	-43.3989	-41.3973	-51.7857	54.4333	2.53333
		40	-47.9	-49.2935	-59.7948	-48.6825	-52.3539	-48.8506	-62.7976	0	5
71	ILL-3829	20	-37.3667	-34.9805	-45.8714	-38.217	-42.0185	-38.3305	-51.0481	67	2.26667
		40	-48.8667	-49.4353	-57.5269	-47.0676	-53.7411	-48.9295	-64.1296	0	4.93333
72	SKL-259	20	-36.5	-34.9742	-47.0433	-37.9275	-43.1019	-36.4611	-47.619	59	2.46667
		40	-47.9	-46.4269	-59.4502	-48.537	-53.9655	-47.7656	-59.7884	0	5
73	ILL-4605	20	-37.7	-33.4424	-47.3998	-39.9929	-44.637	-35.2664	-53.1944	59	2.53333
		40	-47.9	-49.784	-57.5517	-49.3633	-53.5831	-46.1318	-67.5926	0	5
74	ILL-10030	20	-38.0333	-37.2653	-49.4445	-37.9429	-43.7625	-33.3073	-53.4921	59	2.4
		40	-48.5667	-47.214	-58.6562	-49.1981	-53.1831	-48.133	-61.7989	0	5
75	ILL-10031	20	-36.9	-35.0679	-47.3764	-38.2913	-43.7567	-32.6658	-56.6667	62.4333	2.26667
		40	-45.5333	-45.8981	-57.6367	-48.8736	-52.96	-47.1339	-66.2037	0	5
76	ILL-10032	20	-38.0333	-36.1712	-44.1288	-38.8711	-42.1348	-37.9273	-55.0439	59	2.4
		40	-47.5667	-48.1828	-56.5702	-48.4633	-53.1608	-50.095	-63.0169	0	5
77	ILL-10034	20	-37.7	-34.691	-48.6614	-38.4897	-43.702	-38.9519	-55.8772	56.7667	2.4
		40	-45.2333	-49.6708	-58.7959	-49.78	-53.0677	-45.5765	-68.46	0	5
78	ILL-10040	20	-37.3667	-34.8459	-44.3801	-40.0031	-43.7625	-33.0665	-55.5138	62.4333	2.4
		40	-47.9	-49.2383	-56.2329	-49.9333	-52.9958	-49.2363	-65.7338	0	5
79	ILL-10041	20	-37.7	-34.165	-47.1646	-39.8799	-45.1618	-35.5564	-52.7972	56.7667	2.4
		40	-47.9	-48.0693	-58.2167	-47.8546	-53.9655	-47.4566	-67.2235	0	5
80	ILL-10043	20	-37.7	-37.5967	-48.9441	-39.8348	-44.914	-35.5982	-53.2704	55.3333	2.33333
		40	-45.9	-49.3912	-59.1721	-49.9271	-54.7108	-47.7382	-66.3518	0	5
81	ILL-10056	20	-37.7	-33.6329	-44.3765	-39.8214	-41.1698	-41.2198	-53.4921	62.4333	2.4
		40	-48.5667	-49.6771	-55.2448	-47.3794	-52.033	-48.5061	-61.7989	0	5
82	ILL-10062	20	-37.7	-33.9421	-48.6016	-37.5112	-43.3989	-38.8609	-54.0196	56.7667	2.33333
		40	-46.9	-49.283	-56.5488	-48.9498	-53.1905	-45.9659	-64.0212	0	5
83	ILL-10063	20	-37.7	-32.1573	-46.6721	-37.3818	-46.0213	-37.6597	-47.619	62.4333	2.26667
		40	-46.9	-49.283	-56.5488	-48.9498	-53.1905	-45.9659	-64.0212	0	5
84	ILL-10074	20	-37.7	-33.3616	-48.1812	-37.6599	-41.6805	-34.8012	-61.9883	59	2.26667
		40	-47.9	-49.583	-59.2448	-47.6239	-51.7433	-45.8827	-72.3754	0	5
85	ILL-10075	20	-37.7	-36.2878	-45.484	-37.7386	-41.9098	-33.8453	-54.4643	62.4333	2.13333
		40	-46.5667	-48.8017	-59.3833	-47.3373	-52.2842	-46.5062	-62.6323	0	5
86	ILL-10082	20	-37.7	-34.8952	-49.2687	-37.9379	-44.9746	-36.9436	-54.3693	61.3333	2.26667
		40	-45.9	-46.6754	-58.3757	-47.2142	-54.7146	-45.0019	-67.0844	0	5
87	ILL-10133	20	-37.7	-35.0813	-43.0144	-38.3145	-43.0597	-35.1949	-51.2821	62.4333	2.26667
		40	-47.9	-48.1449	-54.8065	-49.4878	-52.1805	-47.17	-62.4949	0	5
88	ILL-10234	20	-37.3667	-32.1352	-48.6981	-39.0658	-41.9098	-35.2185	-54.4643	62.4333	2.33333
		40	-46.5333	-49.7207	-57.7668	-49.794	-52.792	-46.4378	-65.0132	0	5
89	ILL-10266	20	-37.7	-36.3844	-46.2358	-37.888	-42.5321	-37.2154	-54.3693	61.3333	2.33333
		40	-47.9	-48.5064	-58.4262	-49.1602	-53.1586	-49.3547	-67.0844	0	5
90	ILL_10061	20	-36.2333	-37.2152	-43.1303	-35.5026	-40.1575	-28.1561	-41.1492	51.1	2.26667
		40	-46.2	-49.1375	-54.2612	-48.9139	-54.6943	-45.8383	-59.0686	0	5
91	ILL-10270	20	-37.3667	-35.9311	-48.3989	-37.1495	-43.0767	-36.7331	-55.3415	61.3333	2.2
		40	-48.8667	-49.6569	-56.8953	-48.1871	-53.0429	-48.4753	-67.7788	0	5
92	ILL-1046	20	-37.7	-36.2732	-49.3657	-37.7047	-43.9663	-34.8447	-61.0621	58	2.26667
		40	-45.2333	-49.9093	-58.8865	-48.5834	-52.6639	-45.3886	-69.1947	0	5
93	ILL-10756	20	-37.7	-33.0868	-43.7253	-38.3895	-43.3989	-35.1245	-53.2704	61.3333	2.2
		40	-46.5667	-48.8599	-57.4004	-49.5575	-54.0374	-47.0626	-66.3518	0	5
94	ILL-10794	20	-37.3667	-36.5337	-41.526	-39.2025	-44.4871	-37.4243	-53.5243	54.4333	2.53333
		40	-47.9	-46.2986	-55.5826	-49.7167	-53.7379	-47.5521	-69.2879	0	5
95	ILL_10857	20	-37.3667	-33.4465	-42.2684	-33.7017	-43.2892	-37.7674	-56.0624	59.1	2.46667
		40	-48.8667	-48.8004	-56.8795	-42.1241	-53.9655	-47.1717	-66.6082	0	5
96	IG-109039	20	-37.3667	-35.8038	-40.5243	-36.6972	-39.996	-39.2027	-54.2105	59.1	2.46667
		40	-49.1667	-45.0534	-54.3136	-46.3964	-51.4096	-48.3526	-68.46	0	5
97	IG-111991	20	-37.3667	-34.1988	-47.2589	-39.2025	-43.8789	-38.9466	-58.6188	61.3333	2.4
		40	-48.5667	-44.9412	-57.2757	-49.7167	-53.0889	-48.1404	-69.0058	0	5
98	IG-111996	20	-37.7	-30.7659	-46.8837	-39.715	-44.359	-39.6594	-52.147	58	2.46667
		40	-47.9	-48.4991	-56.8795	-48.226	-53.2905	-48.8214	-62.4812	0	5
99	IG-112078	20	-37.7	-35.1396	-47.1324	-39.1474	-44.8703	-39.8284	-53.9327	61.3333	2.4
		40	-48.5667	-44.9977	-58.102	-46.3782	-54.0693	-48.8448	-66.0526	0	5
100	IG-11210	20	-37.7	-36.9507	-45.2297	-34.3353	-43.636	-39.5533	-53.3556	53.4333	2.53333
		40	-46.8667	-42.3294	-57.0993	-43.806	-54.4079	-48.6351	-68.9362	0	5
101	IG-112128	20	-38.0333	-34.506	-47.8324	-36.1105	-44.2802	-35.2326	-57.5	54.5333	2.6
		40	-47.9	-49.705	-57.0191	-44.7922	-52.8781	-44.8534	-67.037	0	5
102	IG-112131	20	-37.7	-34.9608	-48.4391	-37.7336	-44.1077	-37.73	-56.155	59	2.46667
		40	-48.5667	-46.9859	-58.0738	-44.0869	-53.4593	-48.9166	-63.9693	0	5
103	IG-112137	20	-37.7	-34.0455	-46.0481	-39.6085	-44.295	-38.2833	-54.3693	59	2.4
		40	-47.9	-46.2877	-58.6946	-48.3365	-52.7102	-48.7841	-62.4812	0	5
104	IG-116551	20	-37.3667	-34.3336	-47.3274	-39.4292	-44.6512	-34.4725	-56.7948	62.4333	2.4
		40	-47.9	-47.4004	-58.2751	-47.8045	-53.7484	-48.1684	-68.9362	0	5
105	IG-129185	20	-38.7	-35.1404	-48.9441	-36.3663	-42.6915	-38.1196	-57.4458	62.4333	2.4
		40	-49.8667	-49.8189	-57.9696	-46.6667	-53.826	-46.1765	-69.8762	0	5
106	IG-129214	20	-38.0333	-34.7485	-47.2477	-38.4098	-42.8757	-38.581	-52.1272	52.3333	2.46667
		40	-48.7667	-49.4225	-53.5863	-48.9832	-52.2709	-48.0543	-56.0526	0	5
107	IG-129287	20	-37.3667	-32.9466	-43.8389	-37.0644	-40.9072	-39.3932	-58.5492	56.7667	2.4
		40	-49	-48.7928	-58.5548	-45.2275	-52.8007	-47.8452	-67.0844	0	5
108	IG-129291	20	-38.2667	-35.5092	-48.6848	-36.688	-43.0767	-39.2835	-58.7476	59	2.46667
		40	-48.6333	-46.8837	-56.6813	-49.3162	-53.0429	-48.5186	-66.1915	0	5
109	IG-129293	20	-38.0333	-33.0245	-45.8182	-34.1769	-43.1522	-42.5329	-55.8772	59	2.4
		40	-52.5	-48.995	-54.7112	-45.37	-52.4893	-48.7323	-68.46	0	5
110	IG-129302	20	-39.0333	-34.3676	-41.1355	-37.8873	-43.1849	-37.905	-58.1635	56.7667	2.4
		40	-50.8667	-45.0553	-55.0573	-49.695	-53.8821	-47.6518	-69.6379	0	5
111	IG-129304	20	-38.0333	-34.6081	-47.3274	-39.3184	-42.9923	-35.3866	-53.9327	53.3	2.33333
		40	-48.5667	-47.1821	-55.0916	-49.5287	-53.8659	-48.8544	-66.0526	0	5
112	IG-129309	20	-37.7	-31.6421	-46.4488	-39.83	-41.3705	-39.6594	-55.8772	59	2.4
		40	-48.5667	-48.548	-58.0299	-48.1294	-52.3461	-48.8214	-68.46	0	5
113	IG-129313	20	-37.7	-35.0727	-43.7582	-39.4455	-41.795	-43.8107	-59.7661	56.7667	2.4
		40	-48.5667	-46.2059	-53.2976	-49.328	-52.8338	-47.9401	-68.46	0	5
114	IG-129315	20	-38.0333	-37.4383	-47.2215	-38.9913	-45.1146	-35.656	-57.2264	56.7667	2.33333
		40	-48.5667	-47.626	-59.7162	-49.0482	-53.4503	-48.1349	-66.0262	0	5
115	IG-129317	20	-37.3667	-35.1668	-44.0702	-39.9645	-40.5678	-34.0417	-54.308	56.7667	2.4
		40	-47.8667	-47.8029	-58.3544	-49.0087	-52.0212	-48.2891	-61.2476	0	5
116	IG-129319	20	-37.6	-36.3018	-44.6593	-37.888	-43.0099	-36.5485	-55.8995	54.4333	2.53333
		40	-48.4667	-48.8227	-57.6284	-49.1602	-52.3812	-46.7928	-64.4444	0	5
117	IG-129372	20	-37.3667	-34.7819	-41.5647	-37.5721	-46.2819	-37.9709	-52.6316	54.4333	2.53333
		40	-50.6	-48.6293	-55.8647	-48.2079	-55.8294	-47.3793	-61.5107	0	5
118	IG-129560	20	-40.2667	-35.7568	-40.1447	-38.0696	-44.4092	-37.9952	-41.1977	54.4333	2.6
		40	-50.3667	-47.7081	-53.5165	-49.0239	-54.144	-46.3603	-54.5455	0	5
119	IG-12970	20	-38.5	-32.7286	-45.7046	-38.8974	-40.5678	-37.583	-58.7162	59	2.46667
		40	-49	-46.7926	-57.1699	-48.6156	-53.1825	-48.3897	-69.1033	0	5
120	IG-130033	20	-37.3667	-34.3044	-44.6122	-37.5721	-42.5135	-36.4705	-56.5121	59	2.46667
		40	-48.8667	-47.2666	-55.3104	-48.2079	-53.7307	-48.2631	-68.1955	0	5
121	IG-130219	20	-37.3667	-35.3975	-46.4877	-39.4025	-43.0968	-33.9073	-53.2581	54.4333	2.46667
		40	-47.9	-47.8417	-55.5275	-48.1105	-52.258	-46.2844	-65.6955	0	5
122	IG-130272	20	-38.8	-34.1433	-43.209	-39.83	-43.2367	-34.9572	-52.0833	59	2.46667
		40	-49.2	-47.7957	-54.8228	-48.3167	-53.9805	-45.5515	-63.287	0	5
123	IG-134342	20	-36.8333	-37.3047	-45.3185	-37.888	-42.1076	-36.4188	-59.6784	51.1	2.33333
		40	-50.5333	-47.4775	-58.5307	-49.6653	-51.0572	-45.8106	-64.9513	0	5
124	IG-134347	20	-36.5	-35.0009	-45.6389	-35.8519	-38.9779	-37.6045	-56.8576	52.2	2.4
		40	-48.5667	-48.4758	-58.6522	-46.6795	-52.7503	-48.2186	-63.9938	0	5
125	IG-134356	20	-37.7	-35.8134	-43.5699	-38.4098	-43.2892	-34.4779	-56.345	51.1	2.46667
		40	-48.4667	-49.744	-57.1699	-48.9832	-52.0928	-44.3776	-63.1871	0	5
126	IG-135424	20	-37.8333	-33.3075	-43.8936	-36.3189	-43.118	-38.0631	-57.4603	52.2	2.33333
		40	-48.2	-49.4519	-57.4004	-46.9167	-52.425	-47.4452	-66.0053	0	5
127	IG-135428	20	-38.0333	-34.6839	-43.4597	-39.8348	-43.2892	-33.1956	-55.0125	52.2	2.33333
		40	-48.8667	-46.8467	-55.7978	-46.3569	-51.9056	-47.9576	-63.3626	0	5
128	IG-136607	20	-38.0333	-35.9501	-45.7375	-39.5685	-44.4763	-39.6729	-59.1125	52.2	2.33333
		40	-48.4333	-47.7134	-56.7671	-48.9362	-55.0281	-49.3457	-64.4943	0	5
129	IG-136608	20	-39.0333	-34.9718	-43.8034	-39.9169	-41.042	-35.0134	-59.4748	52.2	2.33333
		40	-47.5333	-49.4612	-56.0605	-48.6111	-51.3438	-48.8633	-69.2238	0	5
130	IG-136612	20	-37.7	-34.7228	-45.5433	-37.8901	-42.3025	-39.4467	-55.9552	51.1	2.33333
		40	-48.2	-46.3247	-57.5173	-49.9792	-51.9043	-49.1604	-66.3158	0	5
131	IG-136614	20	-38.0333	-34.7574	-41.1279	-39.5901	-43.028	-35.656	-56.3161	51.1	2.33333
		40	-46.5333	-49.3365	-54.0978	-49.8476	-52.3578	-46.3603	-65.2778	0	5
132	IG-136618	20	-37.7	-35.0173	-46.2707	-37.3764	-44.3942	-36.8256	-57.7193	62.4333	2.26667
		40	-47.5333	-47.463	-58.3095	-48.6869	-53.3034	-45.6678	-66.5107	0	5
133	IG-136620	20	-37.7	-33.807	-43.9118	-36.6999	-43.5806	-32.9266	-55.5867	57.8667	2.46667
		40	-48.5667	-47.2429	-57.1699	-49.7402	-52.6637	-46.9252	-66.0131	0	5
134	IG-136626	20	-37.7	-33.3374	-43.1728	-39.4053	-41.0312	-37.6682	-54.9429	59	2.46667
		40	-47.9	-45.3583	-57.6052	-49.2282	-51.8707	-46.9184	-65.4275	0	5
135	IG-136637	20	-37.3667	-35.5217	-45.9138	-36.0636	-44.5119	-35.2924	-52.3091	57.8667	2.4
		40	-47.9	-47.261	-57.4004	-43.6001	-53.4666	-48.8567	-63.5771	0	5
136	IG-136652	20	-37.3667	-35.4793	-43.5645	-35.6827	-42.1126	-33.4542	-45.0042	62.4333	2.33333
		40	-48.5	-48.7949	-57.8536	-48.1481	-53.0403	-48.9288	-57.7193	0	5
137	IG-136653	20	-36.8	-34.9896	-43.8776	-38.5415	-41.5739	-38.2063	-56.4327	62.4333	2.33333
		40	-48.4667	-49.0257	-53.9933	-46.3574	-52.6014	-47.5725	-67.2828	0	5
138	IG-136673	20	-37.7	-33.4606	-42.7752	-37.6313	-42.1868	-36.5462	-56.1993	62.4333	2.33333
		40	-48.5667	-46.359	-53.4646	-44.8918	-53.5009	-49.6243	-65.217	0	5
139	IG-136788	20	-37.7	-32.5655	-41.3666	-38.5769	-42.4494	-31.3789	-57.174	62.4333	2.26667
		40	-47.9	-48.0964	-53.0367	-46.8798	-52.6531	-44.0419	-67.9739	0	5
140	IG-140910	20	-37.7	-33.4131	-45.7026	-37.2259	-43.028	-35.656	-51.2821	62.4333	2.4
		40	-48.5667	-47.0322	-57.5969	-46.326	-53.0827	-49.5401	-62.4949	0	5
141	IG-149	20	-37.7	-35.4513	-44.3866	-39.8177	-43.3995	-39.709	-61.9883	62.4333	2.4
		40	-48.2333	-48.5374	-52.8665	-46.9483	-52.8449	-48.8581	-68.9362	0	5
142	IG-49	20	-37.7	-34.7181	-42.6558	-37.0066	-42.7697	-37.5838	-54.902	57.8667	2.33333
		40	-49	-46.4017	-56.0144	-49.8119	-52.3453	-45.5829	-64.7331	0	5
143	IG-5320	20	-41	-35.4183	-43.0312	-39.1478	-43.028	-35.5979	-57.6455	57.8667	2.4
		40	-48.5667	-49.465	-57.1198	-46.3187	-52.3461	-46.4862	-62.7513	0	5
144	IG-69540	20	-37.7	-35.3372	-43.5699	-39.0606	-41.7823	-36.0473	-58.1349	62.4333	2.33333
		40	-47.9	-48.6696	-57.1699	-47.162	-52.9079	-49.98	-67.0966	0	5
145	IG-69549	20	-37.7	-33.0005	-41.3419	-38.1833	-42.0549	-35.0532	-58.0117	62.4333	2.33333
		40	-48.8667	-49.1756	-52.7206	-47.2142	-54.6583	-48.374	-64.9513	0	5
146	IG-70174	20	-37.7	-34.0285	-44.2303	-38.3215	-45.7783	-34.9725	-57.3989	62.4333	2.33333
		40	-48.5667	-47.5875	-57.9054	-48.765	-54.254	-45.2602	-65.4729	0	5
147	IG-70230	20	-37.7	-35.6155	-41.9503	-38.6225	-43.2946	-35.6631	-51.8981	60.3333	2.33333
		40	-48.8667	-46.706	-57.249	-46.7369	-51.9698	-42.3286	-61.25	0	5
148	IG-71352	20	-37.7	-35.9932	-43.6949	-34.8041	-52.1551	-35.5861	-55.0439	62.4333	2.33333
		40	-48.5667	-46.0448	-55.5229	-47.8728	-56.9713	-45.7495	-64.386	0	5
149	IG-71630	20	-44.0333	-34.544	-44.2123	-35.7493	-41.0042	-34.0417	-56.3834	62.4333	2.33333
		40	-49.3333	-49.2484	-55.6916	-48.5099	-54.3363	-47.7903	-65.4902	0	5
150	IG-71646	20	-37.7	-33.4573	-45.4663	-38.1964	-43.2354	-36.8256	-57.993	51.2	2.46667
		40	-46.9	-47.9245	-56.0616	-49.1384	-53.6171	-47.2942	-66.8436	0	5
151	IG-71685	20	-38.0333	-35.7152	-41.3764	-36.0135	-42.3201	-35.2801	-57.5475	57.8667	2.26667
		40	-47.9	-46.4752	-51.3895	-43.6986	-51.3337	-47.7701	-68.3473	0	5
152	IG-71710	20	-37.7	-35.7901	-44.7531	-39.3142	-45.6497	-35.656	-56.4327	57.8667	2.33333
		40	-48.5667	-46.1924	-54.7265	-46.902	-55.3548	-47.7511	-68.6452	0	5
153	IG-73717	20	-38.3667	-35.5686	-44.067	-39.8283	-41.2956	-33.7457	-54.2699	57.8667	2.33333
		40	-49.9	-48.4415	-52.1348	-50.004	-53.0844	-46.1636	-64.1125	0	5
154	IG-73798	20	-37.7	-34.9865	-48.6147	-38.6322	-42.1868	-35.8753	-51.8576	57.8667	2.33333
		40	-48.5667	-48.5241	-57.1699	-49.2237	-53.5115	-45.5568	-61.3713	0	5
155	IG-73802	20	-37.7	-35.0173	-45.5771	-36.1429	-41.3834	-37.5767	-52.4842	53.3	2.4
		40	-47.9	-45.1575	-55.2118	-47.5644	-52.1818	-48.6635	-63.2955	0	5
156	IG-73816	20	-37.7	-35.9015	-49.2323	-36.3958	-43.3255	-36.2383	-56.0243	51.2	2.53333
		40	-48.5667	-48.4733	-56.8886	-44.5683	-53.3236	-46.51	-67.6213	0	5
157	IG-73945	20	-37.7	-34.6127	-41.8021	-39.8138	-43.4989	-38.0709	-59.1125	50.1	2.53333
		40	-48.5733	-48.4721	-56.86	-44.5734	-53.3167	-46.5133	-67.62	0	5
158	IG-75920	20	-38.0333	-35.4516	-41.5045	-39.9567	-41.042	-39.1271	-57.4248	51.1	2.33333
		40	-48.5667	-49.6872	-54.1158	-47.7035	-54.2057	-45.3487	-68.2749	0	5
159	IG-9	20	-38.0333	-35.9548	-40.5214	-36.729	-43.6614	-37.6414	-51.1748	51.1	2.53333
		40	-48.5333	-49.4729	-56.7832	-47.551	-52.8147	-47.0309	-63.6122	0	5
160	IG-936	20	-38.8333	-36.1554	-41.5292	-38.6424	-43.1322	-36.2118	-59.6867	50	2.46667
		40	-50.2	-49.0526	-54.5933	-48.8684	-53.1662	-47.4589	-69.7034	0	5
161	IPL-406	20	-41	-35.0579	-43.8936	-39.062	-41.8641	-37.6414	-56.2939	50	2.46667
		40	-52.5667	-47.1187	-57.4004	-49.1534	-52.1151	-46.4193	-66.3304	0	5
162	JL-3	20	-38.0333	-34.1297	-42.6558	-38.7126	-41.3402	-36.6134	-57.9142	50.1	2.6
		40	-49	-49.0607	-54.2017	-49.1174	-51.7222	-48.3286	-68.46	0	5
163	L-404	20	-38.0333	-35.7207	-43.7012	-38.3153	-41.8641	-34.6701	-57.174	52.2	2.4
		40	-50.3333	-48.9251	-52.8629	-49.3923	-56.8466	-45.6438	-67.9739	0	5
164	L-4076	20	-45.5667	-41.4321	-51.1355	-41.8339	-53.9678	-45.7642	-63.4546	46.6667	2.6
		40	-55.7	-52.8555	-61.6105	-51.8826	-62.2187	-55.5955	-74.7227	0	5
165	L-4078	20	-38.0333	-35.6891	-43.8936	-39.1682	-43.7613	-37.7629	-59.7661	56.4333	2.53333
		40	-49.7	-46.2891	-57.4004	-49.4762	-53.686	-47.8013	-66.7934	0	5
166	L-4147	20	-45.8667	-40.9531	-51.5453	-41.5102	-53.4303	-44.1458	-63.2749	46.6667	2.73333
		40	-55.3	-52.2707	-61.7027	-50.3892	-61.459	-52.0165	-73.2916	0	5
167	L-4578	20	-38.1333	-33.2481	-43.5699	-38.6284	-42.1366	-33.1454	-50.2339	52	2.46667
		40	-49.9	-46.5241	-54.9476	-49.5934	-52.2555	-47.7649	-64.1082	0	5
168	L-4590	20	-38.1333	-35.2046	-44.3588	-37.6777	-42.0716	-35.8842	-59.7661	54.2333	2.53333
		40	-49.9667	-48.6051	-55.7855	-48.3059	-51.4921	-46.1771	-66.7934	0	5
169	L-4594	20	-38.1333	-35.6681	-44.5132	-35.8617	-42.4224	-33.769	-59.7661	55.7667	2.46667
		40	-49.3667	-48.6258	-56.2356	-46.2693	-53.272	-48.1693	-66.7057	0	5
170	L-4603	20	-39.5667	-34.7051	-47.1471	-37.2035	-43.6655	-35.7501	-56.1598	55.6667	2.46667
		40	-50.5667	-45.6368	-57.7768	-48.7813	-54.6334	-49.5591	-66.7057	0	5
171	L-4605	20	-38.5	-35.313	-46.2707	-38.925	-41.143	-35.4219	-56.2939	53.3333	2.46667
		40	-50.5667	-46.7572	-57.3359	-47.4332	-51.7409	-47.1187	-67.3026	0	5
172	L-4618	20	-19.4667	-16.3607	-19.5358	-18.3126	-28.7979	-17.5075	-36.8212	92	1.13333
		40	-36.5	-28.3093	-31.1084	-27.7926	-37.8908	-28.1775	-47.5042	45.4333	2.6
173	L-4619	20	-37.7	-36.0592	-47.0923	-37.2088	-42.2169	-33.9555	-56.6228	54.4333	2.46667
		40	-48.8667	-47.0575	-58.0738	-47.1675	-51.4139	-46.8833	-62.1272	0	5
174	L-4620	20	-37.7	-34.5203	-43.5832	-39.9362	-44.9836	-34.8228	-57.2577	55.6667	2.46667
		40	-48.8667	-49.1947	-54.6752	-48.6204	-54.7188	-46.6991	-69.8622	0	5
175	L-4650	20	-38.0333	-34.4476	-44.2303	-39.8177	-43.3995	-34.5396	-56.4057	55.6667	2.46667
		40	-51	-44.5275	-57.4004	-48.1317	-53.3884	-46.5655	-65.2563	0	5
176	L-4701	20	-38.9333	-33.009	-43.8936	-37.2146	-42.3419	-35.3413	-56.4327	55.6667	2.4
		40	-49.5667	-43.5824	-57.4004	-48.8235	-51.1801	-48.7015	-65.1267	0	5
177	L-5253	20	-38.0333	-33.7907	-44.2303	-38.7572	-43.2952	-33.9677	-45.6863	56.7667	2.33333
		40	-51.2	-46.0089	-57.4004	-49.3047	-52.7615	-44.9226	-62.6634	0	5
178	L-7752	20	-39.6	-34.0287	-41.5292	-35.9947	-45.6212	-36.0765	-57.9979	56.7667	2.33333
		40	-52.6	-45.9804	-55.7169	-46.6264	-53.4374	-48.1147	-67.1827	0	5
179	L-7818	20	-39.3333	-33.1606	-43.7191	-37.2088	-48.2307	-34.4739	-56.0243	56.7667	2.33333
		40	-50.6333	-44.1507	-52.6169	-46.3203	-56.6381	-44.8895	-61.8228	0	5
180	L7905	20	-38.3667	-34.3624	-44.2303	-39.4241	-42.25	-38.8683	-45.0164	57.8667	2.33333
		40	-50.2667	-46.2848	-55.0034	-49.9042	-53.0469	-46.9076	-65.5581	0	5
181	L-7920	20	-38.1333	-33.262	-45.167	-38.6375	-42.744	-38.6222	-58.0117	55.6667	2.33333
		40	-49.9	-47.6067	-55.7268	-49.2131	-51.1265	-47.5444	-66.7057	0	5
182	LC-270-804	20	-38.1333	-32.6231	-47.7522	-36.8319	-38.6456	-39.4359	-51.4327	56.7667	2.33333
		40	-49.5667	-47.6602	-58.7539	-45.0384	-48.1618	-47.8518	-63.4503	0	5
183	LC-282-1077	20	-37.6	-32.1259	-44.1742	-36.3638	-43.2785	-32.9299	-52.381	56.7667	2.46667
		40	-48.6667	-47.451	-51.6845	-46.9897	-53.6897	-45.5739	-65.0132	0	5
184	LC-282-1110	20	-19.9	-17.2868	-34.2954	-17.4183	-28.6772	-17.8806	-32.3865	91	1.33333
		40	-38.9667	-29.0986	-43.6335	-27.4247	-37.478	-28.4608	-47.9671	45	2.53333
185	LC-282-1444	20	-37.7	-32.4972	-43.0571	-38.3784	-44.8804	-34.1871	-58.6466	54.2333	2.53333
		40	-48.6667	-45.6022	-54.4348	-49.3068	-54.6363	-46.7233	-67.2793	0	5
186	LC-282-896	20	-37.7	-35.8444	-40.5243	-36.8779	-43.2019	-34.4864	-57.993	55.6667	2.4
		40	-48.6667	-43.3033	-55.3871	-47.3084	-52.0208	-45.6476	-66.8436	0	5
187	LC-284-116	20	-38.8667	-33.3549	-41.9877	-38.2635	-43.3472	-34.7483	-56.8122	56.7667	2.4
		40	-49.4	-46.1432	-57.6635	-47.5108	-52.1464	-49.2843	-66.2698	0	5
188	LC-284-1209	20	-38.1333	-34.4892	-44.7756	-39.9362	-42.6397	-36.2408	-56.3492	56.7667	2.4
		40	-48.8667	-44.9916	-58.4507	-48.2138	-51.7432	-47.4659	-65.8069	0	5
189	LC-285-1344	20	-38.0333	-33.6189	-41.5333	-39.9362	-45.0172	-36.2408	-58.6466	56.7667	2.46667
		40	-48.5667	-44.1674	-55.6498	-48.4907	-54.1199	-47.9137	-67.2793	0	5
190	LC-289-1444	20	-38.5	-32.6895	-42.5388	-38.3784	-42.8472	-37.0607	-59.4989	56.7667	2.46667
		40	-49.2667	-46.3604	-54.3941	-48.9522	-52.0946	-46.021	-66.939	0	5
191	LC-289-1447	20	-38.0667	-34.5012	-43.5824	-39.1132	-44.5978	-36.2408	-55.1744	56.7667	2.46667
		40	-47.3333	-42.4615	-55.0034	-47.8536	-55.0363	-43.9773	-69.8622	0	5
192	LC-292-1485	20	-36.8333	-36.82	-43.8821	-37.1771	-42.1571	-35.1313	-57.4603	56.7667	2.4
		40	-50.3667	-44.0015	-56.7954	-45.2995	-54.5773	-43.6223	-68.1349	0	5
193	LC-292-1544	20	-39.3	-35.9365	-43.2897	-37.7924	-42.4525	-37.2825	-53.631	56.7667	2.33333
		40	-49.1667	-45.9805	-56.3938	-47.0138	-53.4737	-46.3603	-64.7817	0	5
194	LC-292-997	20	-38.2667	-34.3279	-42.2456	-36.2253	-42.6397	-32.5944	-56.4327	56.7667	2.33333
		40	-48.8667	-44.6956	-54.1043	-44.7723	-55.1591	-49.4728	-66.9786	0	5
195	LC-300-11	20	-38.4667	-34.3937	-44.483	-37.3583	-48.0195	-37.583	-48.7037	55.6667	2.46667
		40	-48.5667	-45.7886	-57.7661	-45.1067	-56.6262	-47.4413	-60.1852	0	5
196	LC-300-12	20	-39.7	-36.2444	-44.613	-37.9275	-42.7513	-33.1454	-57.381	55.6667	2.33333
		40	-50.2667	-44.2544	-57.9629	-48.537	-52.6455	-48.2013	-68.0556	0	5
197	LC-300-13	20	-38.2667	-37.299	-44.1252	-39.9765	-41.9898	-36.3243	-55.5613	56.7667	2.4
		40	-50.1	-44.8833	-58.0016	-48.5333	-54.6155	-47.3913	-66.6953	0	5
198	LC-300-15	20	-19.8333	-17.4696	-26.0195	-19.449	-26.1413	-17.1544	-36.5549	90	1.16667
		40	-39.5	-27.3313	-38.2029	-46.974	-37.9064	-28.9236	-48.4962	48	2.33333
199	LC-300-16	20	-38.9333	-33.7943	-42.6778	-39.8366	-45.9477	-33.5079	-58.9808	54.5333	2.53333
		40	-45.1667	-46.1778	-57.3146	-49.9769	-55.3467	-46.7216	-67.516	0	5
200	LC-300-2	20	-38.2667	-37.7906	-41.4999	-39.2377	-43.1045	-34.4864	-53.4169	54.4333	2.46667
		40	-51.1333	-46.0273	-56.5253	-46.0562	-52.5864	-49.0486	-65.0209	0	5
201	LC-300-3	20	-40.8	-36.5816	-42.3691	-39.9362	-41.6461	-33.3168	-54.7741	54.6667	2.46667
		40	-49	-44.4774	-54.8065	-46.7377	-51.3212	-48.9553	-62.735	0	5
202	LC-300-4	20	-40.3333	-35.1778	-45.4318	-36.5401	-45.5363	-34.6156	-51.6708	57.8667	2.33333
		40	-49.8667	-44.7829	-56.0616	-43.0318	-55.9476	-45.7052	-64.1743	0	5
203	LC-300-6	20	-39.9667	-35.4197	-44.0835	-35.5657	-42.2468	-33.4946	-56.0185	56.7667	2.4
		40	-49.4	-46.5257	-57.8536	-45.399	-53.3875	-47.4382	-65.5556	0	5
204	LC-300-7	20	-18.2	-25.1547	-31.1224	-18.7388	-24.2528	-19.9543	-36.4244	92	1.26667
		40	-38.2667	-28.6222	-41.1509	-28.8824	-38.3654	-28.054	-46.6444	44.3333	2.53333
205	LC-300-8	20	-40.3667	-34.6043	-41.4876	-35.4512	-46.7084	-32.0126	-55.7143	55.7667	2.46667
		40	-48.5667	-45.469	-55.1625	-47.2738	-56.8651	-45.5967	-65.9259	0	5
206	LC-300-9	20	-17.6	-18.0254	-32.3652	-17.7212	-29.2159	-17.7111	-37.0593	90	1
		40	-36.1667	-28.7179	-42.1027	-29.8763	-38.7875	-28.0406	-48.4962	48.7667	2.53333
207	LC-74-1-51	20	-38.5	-36.5297	-44.062	-39.7867	-41.9581	-36.019	-54.2552	54.5333	2.46667
		40	-49.9	-46.6087	-56.0616	-48.3036	-52.0295	-49.3309	-68.0908	0	5
208	PDL-1	20	0	-8.43352	-17.8634	-14.3386	-17.1896	-15.7445	-28.2736	100	0
		40	0	-16.0919	-24.719	-18.8318	-27.2331	-20.2637	-39.7479	60.3333	2.33333
209	PDL-2	20	-19.5	-18.5104	-26.8831	-17.2234	-28.0184	-18.5318	-33.2817	92	1.06667
		40	-37.5	-28.8448	-39.8009	-29.5822	-38.6777	-28.6623	-45.7998	43.4333	2.66667
210	PKVL-1	20	-39.5	-34.8575	-40.5101	-38.9094	-42.0624	-35.9887	-54.2105	54.4333	2.53333
		40	-52.4667	-45.7927	-54.5747	-47.1678	-52.1167	-46.7214	-68.4137	0	5
211	PL-1	20	-37.7	-35.6494	-45.3046	-38.6774	-44.0119	-34.3912	-54.0248	53.3333	2.53333
		40	-49.5667	-44.234	-57.2565	-47.4074	-55.6228	-49.8888	-61.9066	0	5
212	PL-4	20	-37.7	-35.6549	-45.6275	-38.5758	-43.9803	-37.1684	-57.9142	53.3333	2.46667
		40	-48.5667	-45.6249	-58.8639	-47.7799	-55.6287	-48.0737	-68.2749	0	5
213	PL-406	20	-37.7	-34.8083	-41.6473	-39.8985	-47.4768	-32.8991	-51.6708	53.3333	2.46667
		40	-48.5667	-45.4761	-56.847	-45.9336	-55.7271	-49.156	-62.5209	0	5
214	PL-5	20	-37.7	-37.1633	-43.9118	-37.5594	-44.6142	-37.3915	-57.729	53.3333	2.53333
		40	-48.5667	-44.8929	-58.2831	-47.7389	-53.6064	-49.3176	-66.6082	0	5
215	Sehore-74-3	20	-37.7	-34.4637	-43.5699	-39.9575	-47.6247	-36.5852	-55.0125	54.4333	2.53333
		40	-48.5667	-44.7379	-58.3664	-49.0775	-56.796	-48.2025	-65.3996	0	5
216	VL-507	20	-37.7	-34.726	-43.5782	-34.6035	-48.7647	-35.8753	-54.2552	55.7667	2.4
		40	-49.2333	-44.1713	-57.1699	-46.2467	-57.8054	-48.3098	-66.5979	0	5
217	121/12	20	-39.7	-35.4347	-41.9585	-38.6375	-45.4089	-29.2914	-59.2314	56.7667	2.4
		40	-50.6	-45.5437	-52.8748	-49.2131	-56.3777	-46.7102	-69.4236	0	5
218	1220/11	20	-19.5	-18.6975	-29.3382	-17.034	-29.7565	-16.9303	-36.2123	92	1.13333
		40	-37.7	-29.862	-39.4001	-35.7526	-35.507	-20.8437	-48.5994	46.6667	2.6
219	210/11	20	-39	-35.4507	-43.4073	-35.2928	-37.7246	-33.4944	-51.4815	54.4333	2.46667
		40	-51.2	-45.8057	-56.5995	-45.1779	-53.8671	-48.6629	-61.9444	0	5
220	330/12	20	-38.0333	-37.2674	-44.7472	-38.2385	-47.7282	-36.5937	-53.631	53.4333	2.46667
		40	-49	-46.0985	-57.7284	-48.2153	-56.1727	-48.1043	-65.4167	0	5
221	DPL-62	20	-38.0333	-34.9581	-43.0354	-34.4364	-41.8652	-38.2101	-51.1158	53.4333	2.46667
		40	-51.8333	-45.5156	-55.8647	-46.7229	-52.1679	-49.3309	-60.9585	0	5
222	E-153	20	-38.1333	-36.4693	-43.0946	-34.3196	-45.1144	-36.067	-51.1748	53.4333	2.46667
		40	-49.8667	-46.0102	-56.7671	-43.268	-56.6166	-50.5013	-63.6122	0	5
223	WBL-77	20	-38.0333	-36.211	-44.1252	-36.659	-43.2892	-35.2801	-61.4286	53.4333	2.46667
		40	-49.8667	-44.4809	-57.3243	-44.5354	-54.0374	-49.7512	-67.8571	0	5
224	PSL-9	20	0	-8.55272	-18.5039	-14.0154	-17.0741	-13.9174	-28.9129	100	0
		40	0	-18.813	-25.7559	-19.662	-25.0765	-20.2594	-39.9441	60.3333	2.33333
225	ILWL-06	20	-33.2107	-36.3885	-41.4331	-34.4203	-47.5782	-34.3236	-51.9414	55.6667	2.33333
		40	-42.5311	-45.1683	-55.2713	-43.6578	-56.7185	-48.0277	-65.6218	0	5
226	ILWL-09	20	-23.791	-34.2974	-43.6644	-36.2818	-48.9211	-33.8434	-57.985	52.3333	2.4
		40	-40.7414	-44.3224	-54.2189	-44.8882	-58.3905	-45.3134	-69.582	0	5
227	ILWL-10	20	-23.9058	-35.4509	-46.2606	-35.6129	-49.6593	-36.332	-39.9802	55.6667	2.4
		40	-41.8288	-45.8781	-57.8201	-44.9658	-59.1177	-47.7397	-62.2817	0	5
228	ILWL-100	20	-34.4167	-35.1952	-45.833	-37.321	-46.7375	-36.8784	-51.4087	55.6667	2.4
		40	-49.0911	-45.6112	-57.506	-46.2812	-56.0247	-48.7768	-62.5595	0	5
229	ILWL-104	20	-29.3834	-35.4664	-49.4321	-36.4114	-45.2089	-33.5273	-52.5519	55.6667	2.4
		40	-49.4311	-44.468	-59.7076	-46.3315	-56.9756	-48.4107	-62.2833	0	5
230	ILWL-125	20	-28.3846	-37.259	-44.2878	-33.0702	-48.6973	-35.0284	-60.5994	56.7667	2.4
		40	-44.8259	-46.5493	-57.9235	-42.9566	-58.6874	-46.7013	-68.0434	0	5
231	ILWL-128	20	-29.6959	-36.6908	-42.0778	-37.8903	-47.9005	-33.3964	-56.5121	56.7667	2.4
		40	-44.505	-45.2749	-58.5021	-45.1085	-56.4874	-47.3413	-68.1955	0	5
232	ILWL-13	20	-28.3009	-34.9521	-44.952	-32.7123	-46.7152	-31.2641	-51.0481	54.4333	2.46667
		40	-42.9167	-45.2664	-59.0592	-42.2667	-56.0025	-46.3144	-64.1296	0	5
233	ILWL-133	20	-30.8863	-34.4197	-42.8079	-38.5149	-48.9878	-34.686	-52.1592	55.7667	2.53333
		40	-43.8558	-47.3429	-57.9913	-46.6773	-57.3809	-48.7772	-65.5581	0	5
234	ILWL-137	20	-30.8321	-36.5902	-43.2251	-34.9251	-50.4762	-35.7855	-61.4327	57.8667	2.46667
		40	-44.81	-46.3353	-55.5425	-45.621	-57.6231	-48.7898	-68.5575	0	5
235	ILWL-142	20	-30.7122	-34.7001	-45.2332	-39.9353	-45.0625	-32.877	-53.2643	56.7667	2.33333
		40	-44.0466	-46.5151	-57.1687	-46.8677	-52.9024	-47.6685	-62.422	0	5
236	ILWL-15	20	0	-8.87026	-17.9308	-12.3945	-17.7012	-13.6617	-28.5521	100	0
		40	0	-16.2042	-23.142	-18.9015	-24.446	-19.4144	-39.5701	62.4333	1.83333
237	ILWL-165	20	-31.5665	-38.7704	-47.384	-33.1872	-49.9253	-36.332	-52.729	52.3333	2.4
		40	-44.4694	-49.8046	-58.5288	-42.4206	-58.5679	-47.1375	-63.2749	0	5
238	ILWL-184	20	-31.3352	-35.0501	-48.2166	-37.5248	-47.6132	-36.8784	-51.8576	55.7667	2.46667
		40	-42.8725	-44.1211	-59.277	-46.8329	-55.963	-47.0862	-64.8435	0	5
239	ILWL-185	20	-30.7732	-36.0081	-44.613	-38.7353	-48.6027	-34.7506	-52.9412	54.4333	2.46667
		40	-44.3981	-49.439	-54.9527	-47.3935	-55.22	-50.183	-64.7331	0	5
240	ILWL-192	20	-0.0356506	-9.45258	-17.7505	-13.9078	-16.7368	-13.6795	-29.8037	100	0
		40	-0.0356506	-16.927	-23.6564	-19.9274	-25.8703	-18.9949	-39.0664	62.4333	1.53333
241	ILWL-20	20	0	-8.14056	-17.3203	-14.4429	-18.6961	-13.9592	-25.5051	100	0
		40	0	-16.4769	-26.5219	-19.6397	-27.2624	-18.9985	-35.4798	62.4333	1.6
242	ILWL-203	20	-29.9764	-35.4282	-48.3805	-31.7665	-46.0773	-34.9448	-56.0243	54.4333	2.4
		40	-43.257	-48.2455	-59.7004	-41.7792	-58.756	-48.422	-65.5379	0	5
243	ILWL-221	20	-30.655	-34.0702	-45.8699	-33.7416	-41.7518	-33.0696	-52.4561	54.6667	2.4
		40	-44.9538	-47.5622	-54.3419	-43.2393	-55.9191	-48.1516	-62.8216	0	5
244	ILWL-227	20	-31.2111	-33.3311	-45.833	-34.2644	-40.6026	-33.0696	-52.7778	55.6667	2.4
		40	-44.4694	-48.6923	-52.7079	-41.7904	-55.8612	-46.7776	-62.4008	0	5
245	ILWL-23	20	-33.682	-33.2176	-46.4752	-37.321	-48.7524	-36.534	-53.9136	53	2.33333
		40	-44.7347	-47.2861	-55.0628	-46.2812	-57.7784	-46.8061	-65.5581	0	5
246	ILWL-237	20	-32.5357	-34.3002	-44.0964	-34.315	-48.5988	-35.377	-51.7628	56.7667	2.33333
		40	-44.482	-44.1395	-56.9635	-44.3954	-56.6614	-49.1681	-61.2714	0	5
247	ILWL-238	20	-30.2478	-34.2098	-44.2779	-32.9145	-46.7448	-38.0218	-51.4087	56.7667	2.33333
		40	-45.2704	-48.1133	-57.1363	-43.6259	-57.0482	-48.4039	-64.7817	0	5
248	ILWL-253	20	-30.7965	-35.8741	-44.5551	-33.3061	-46.542	-36.1984	-54.0598	55.6667	2.33333
		40	-44.2604	-44.8033	-57.9487	-42.7841	-54.7816	-46.4704	-64.0491	0	5
249	ILWL-269	20	-34.683	-34.2874	-45.2671	-33.0678	-49.0023	-34.47	-62.6827	56.7667	2.33333
		40	-45.1603	-46.5974	-56.3162	-42.8464	-56.91	-48.4457	-69.6951	0	5
250	ILWL-29	20	-30.4411	-35.4651	-43.1463	-38.8776	-51.4968	-34.7169	-53.9606	55.7667	2.33333
		40	-46.3812	-46.0298	-56.2469	-44.6439	-59.7179	-43.3346	-65.6364	0	5
251	ILWL-292	20	-17.9233	-16.2264	-29.1598	-31.1445	-26.1694	-19.2465	-37.5122	91	1
		40	-33.5227	-28.5152	-39.5993	-34.477	-38.0654	-25.7814	-50.6457	46.4333	2.66667
252	ILWL-3	20	-32.9939	-36.1344	-46.2988	-34.3186	-48.2047	-32.9395	-54.3693	55.6667	2.4
		40	-44.12	-46.6101	-56.1574	-44.1851	-57.2521	-48.473	-67.0844	0	5
253	ILWL-314	20	-32.7856	-36.9913	-45.811	-38.6349	-48.2702	-33.0533	-51.4006	55.6667	2.4
		40	-45.8339	-47.6333	-55.2044	-44.6439	-58.613	-48.1577	-66.334	0	5
254	ILWL-320	20	-19.3066	-17.1372	-28.8133	-17.8003	-27.2934	-20.0784	-39.014	91	1
		40	-39.2182	-29.2312	-36.9728	-29.3104	-38.2286	-29.0946	-49.2754	43.3333	2.6
255	ILWL-321	20	-19.9059	-13.4704	-27.2987	-19.4042	-27.8854	-19.9307	-38.5062	91	1.06667
		40	-39.7961	-29.8472	-38.1634	-27.0303	-39.0414	-30.6126	-48.1424	42	2.46667
256	ILWL-334	20	-31.0077	-33.0674	-41.4897	-36.184	-44.1236	-35.3881	-56.0243	56.7667	2.26667
		40	-43.711	-45.3082	-58.5288	-45.4857	-55.0784	-43.2683	-65.5379	0	5
257	ILWL-340	20	-32.5818	-36.871	-44.3794	-33.3061	-44.9966	-32.3807	-53.3333	56.7667	2.26667
		40	-44.2793	-47.2817	-57.7925	-45.0013	-57.3865	-48.2938	-64.623	0	5
258	ILWL-35	20	-31.9818	-36.1615	-43.7625	-36.1468	-45.2663	-34.2805	-54.1667	56.7667	2.26667
		40	-44.1886	-45.251	-58.1611	-45.2664	-53.8803	-49.0933	-66.7989	0	5
259	ILWL-350	20	-30.0602	-34.9372	-43.9927	-35.7244	-49.9978	-34.7656	-53.4921	55.6667	2.26667
		40	-44.7024	-46.6259	-57.6635	-42.0201	-57.7832	-48.4447	-66.4021	0	5
260	ILWL-357	20	-30.1834	-33.7965	-42.6701	-33.0717	-47.4416	-34.4522	-52.1592	56.7667	2.26667
		40	-43.3834	-45.0175	-53.4491	-45.7724	-55.8469	-49.6362	-65.5581	0	5
261	ILWL-361	20	-31.8756	-34.6295	-45.0161	-33.5302	-44.9489	-34.4256	-57.729	57.8667	2.26667
		40	-44.5089	-45.5085	-57.575	-43.3315	-53.2423	-45.9797	-68.46	0	5
262	ILWL-362	20	-30.1194	-34.0999	-42.2775	-37.7056	-48.644	-36.8784	-53.3333	55.6667	2.26667
		40	-43.7148	-46.4289	-53.4311	-46.6473	-56.7411	-47.9064	-63.4259	0	5
263	ILWL-366	20	-30.5042	-33.4372	-42.4135	-37.2911	-51.2239	-36.5683	-51.5797	55.6667	2.26667
		40	-43.8818	-45.6226	-53.6289	-46.2617	-59.8905	-49.0026	-63.2555	0	5
264	ILWL-370	20	-30.7965	-33.701	-45.758	-34.8249	-43.8817	-38.0378	-52.381	56.7667	2.26667
		40	-45.6888	-46.9288	-58.5288	-44.4695	-55.5702	-47.7569	-61.7063	0	5
265	ILWL-377	20	-30.935	-34.7884	-41.2592	-35.5106	-48.4879	-34.3309	-54.4643	55.6667	2.26667
		40	-44.9757	-47.5535	-53.8483	-46.3274	-57.6406	-47.3215	-62.6323	0	5
266	ILWL-398(A)	20	-34.1738	-34.5388	-40.1782	-33.1979	-47.0607	-35.9174	-55.7792	56.7667	2.26667
		40	-44.0268	-46.3254	-54.9294	-43.2516	-54.9001	-47.8793	-65.4154	0	5
267	ILWL-401	20	-35.6277	-35.2616	-42.8292	-36.7014	-45.3224	-38.0218	-53.3333	55.6667	2.26667
		40	-44.6915	-45.9083	-54.1533	-46.2784	-53.509	-48.1287	-65.6481	0	5
268	ILWL-415	20	-19.6437	-14.9021	-26.5934	-19.2275	-28.63	-18.7222	-38.0037	91	1.13333
		40	-35.8925	-29.0167	-37.4115	-28.0905	-38.074	-28.7675	-47.1154	45.6667	2.6
269	ILWL-418	20	-33.7283	-32.7503	-42.601	-37.9697	-47.3753	-36.9649	-52.1592	53.3333	2.33333
		40	-43.7754	-48.4951	-55.6501	-48.2846	-55.0871	-47.2011	-64.9629	0	5
270	ILWL-428	20	-31.0213	-33.0089	-42.1219	-33.5984	-43.3252	-34.4202	-46.6264	54.4333	2.33333
		40	-44.9813	-46.1341	-54.2689	-41.9236	-53.4781	-49.5365	-62.6848	0	5
271	ILWL-430	20	-33.3146	-34.676	-48.3805	-33.6446	-47.1955	-36.7282	-57.2304	54.4333	2.4
		40	-42.4164	-45.8827	-59.7004	-47.75	-56.6943	-47.6551	-65.3186	0	5
272	ILWL-436	20	-19.1572	-17.8695	-27.2268	-17.2677	-23.7612	-17.1399	-39.8684	91	1.13333
		40	-31.1896	-28.6312	-38.0141	-28.2852	-32.7941	-30.5579	-47.6827	44.2333	2.66667
273	ILWL-437	20	-30.9103	-37.5299	-40.1194	-34.1937	-47.3563	-34.7339	-56.5223	53.3333	2.46667
		40	-43.381	-48.961	-53.9731	-45.6461	-55.3516	-46.3395	-68.3143	0	5
274	ILWL-438	20	-32.1248	-35.388	-46.1079	-33.7074	-44.6697	-33.3988	-52.1592	54.5333	2.46667
		40	-43.4585	-46.1586	-55.2768	-49.5533	-53.6399	-46.7916	-63.1772	0	5
275	ILWL-44	20	-30.4168	-35.5724	-43.5942	-34.7285	-44.5428	-37.6428	-56.2939	54.5667	2.4
		40	-43.4513	-45.3728	-54.4013	-42.0032	-56.9693	-45.5399	-64.1082	0	5
276	ILWL-447	20	-30.2943	-34.7961	-39.6777	-33.8667	-51.0014	-37.7081	-52.0228	54.4333	2.46667
		40	-41.804	-48.4678	-46.6068	-44.0718	-58.8235	-46.771	-63.4473	0	5
277	ILWL-462	20	-32.4402	-35.0139	-42.2698	-34.3125	-41.9103	-35.4415	-51.0684	54.4333	2.46667
		40	-43.3165	-49.8408	-56.764	-43.8118	-58.5901	-47.3412	-61.2714	0	5
278	ILWL-464	20	-33.3121	-37.4178	-42.0209	-33.422	-42.6911	-33.8782	-49.1987	56.7667	2.4
		40	-43.6618	-46.0527	-53.6797	-43.5021	-56.9792	-43.6766	-63.2555	0	5
279	ILWL-472	20	-33.0506	-34.9766	-39.913	-36.5839	-50.8665	-37.0728	-54.3693	56.7667	2.26667
		40	-40.1566	-46.0085	-54.1168	-44.436	-58.4255	-46.0381	-67.0844	0	5
280	ILWL-55(2)	20	-32.8504	-34.1869	-45.7644	-35.9951	-49.0184	-38.6437	-52.8658	57.8667	2.4
		40	-42.987	-45.6723	-58.8947	-44.6662	-58.6042	-43.9989	-64.1133	0	5
281	ILWL-58	20	-32.3044	-35.5535	-42.7558	-32.9473	-51.5798	-34.47	-51.4128	56.7667	2.26667
		40	-44.3147	-48.8336	-56.2116	-42.6804	-58.1569	-45.9296	-64.907	0	5
282	ILWL-60	20	-31.0781	-35.556	-45.1494	-33.5143	-47.2067	-34.7169	-53.1339	56.7667	2.26667
		40	-43.0593	-47.8318	-53.0718	-43.0034	-57.3198	-46.6652	-59.9308	0	5
283	ILWL-69	20	-30.7428	-35.1863	-40.6996	-34.313	-48.0358	-34.4879	-55.3439	56.7667	2.26667
		40	-43.3473	-45.3934	-56.9676	-43.4301	-56.5923	-44.2169	-61.7989	0	5
284	ILWL-83	20	-33.5	-35.3642	-45.7073	-32.3097	-46.3971	-35.1365	-53.3333	56.7667	2.2
		40	-44.8667	-45.5422	-58.7365	-43.3878	-54.6285	-47.9772	-63.4259	0	5
285	ILWL-95	20	-32.6638	-37.92	-46.6454	-34.0226	-44.6538	-34.6333	-57.8625	56.7667	2.26667
		40	-42.4372	-46.5235	-58.1611	-45.3	-54.4685	-46.682	-69.4595	0	5
